# Supplementary material for: YA is needed for proper nuclear organization to transition between meiosis and mitosis in Drosophila
Source: PubMed Central journal article supplement (PMC2724486; doi:10.1186/1471-213x-9-43), 2009-07-23
Supplement: 1471-213X-9-43-S1.pdf [file 1471-213X-9-43-S1.pdf]

**Supplemental Figure S1:**

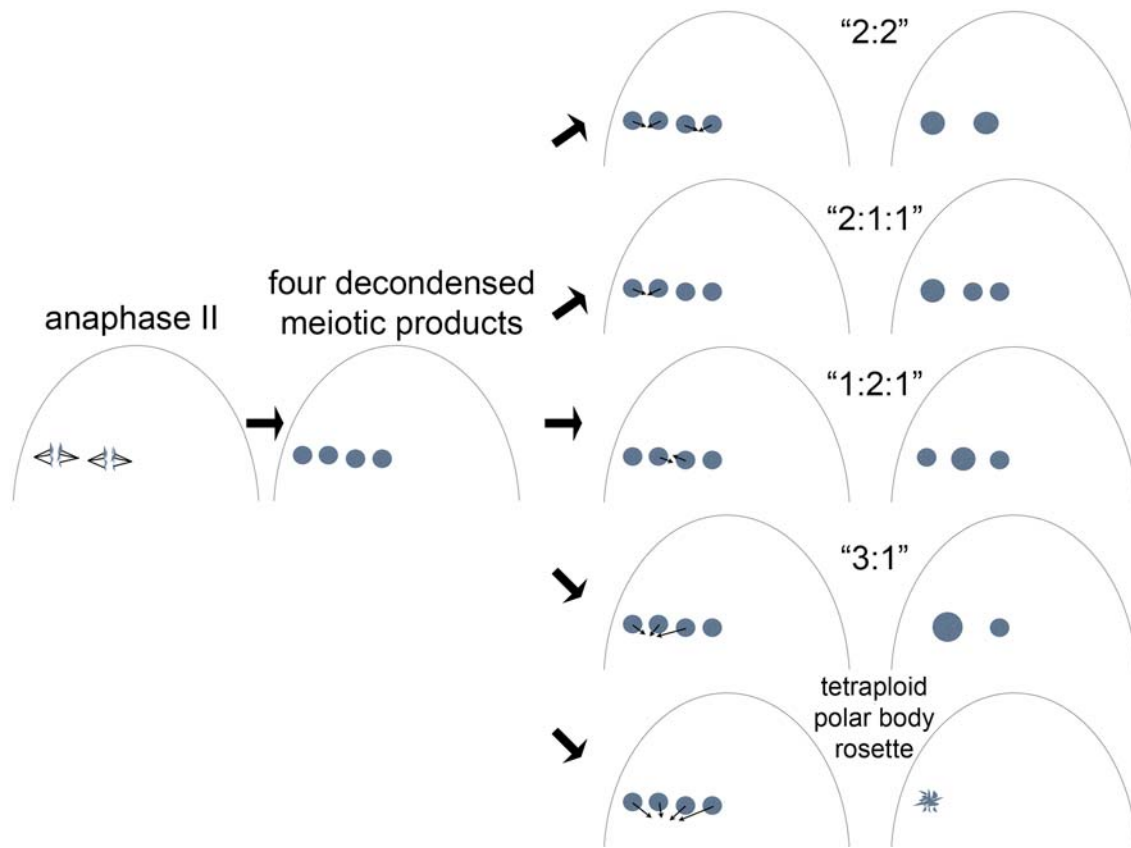

**Supplemental Figure S1: Nuclear associations in unfertilized eggs.**

The two meiosis II spindles are arranged in a line oriented perpendicular to the egg cortex [18,21]. After telophase II, the female meiotic products decondense their chromatin into a postmeiotic interphase-like state. The possible subsequent associations are illustrated on the right. Four haploid meiotic products, "3:1", and tetraploid polar body rosette are the only nuclear distributions seen in controls. These nuclear distributions are also present in  $Ya^2$  eggs, along with the additional abnormal associations "2:2", "2:1:1" and "1:2:1".

**Supplemental Figure S2:**

**Duration of activation affects distribution of stages of meiosis**

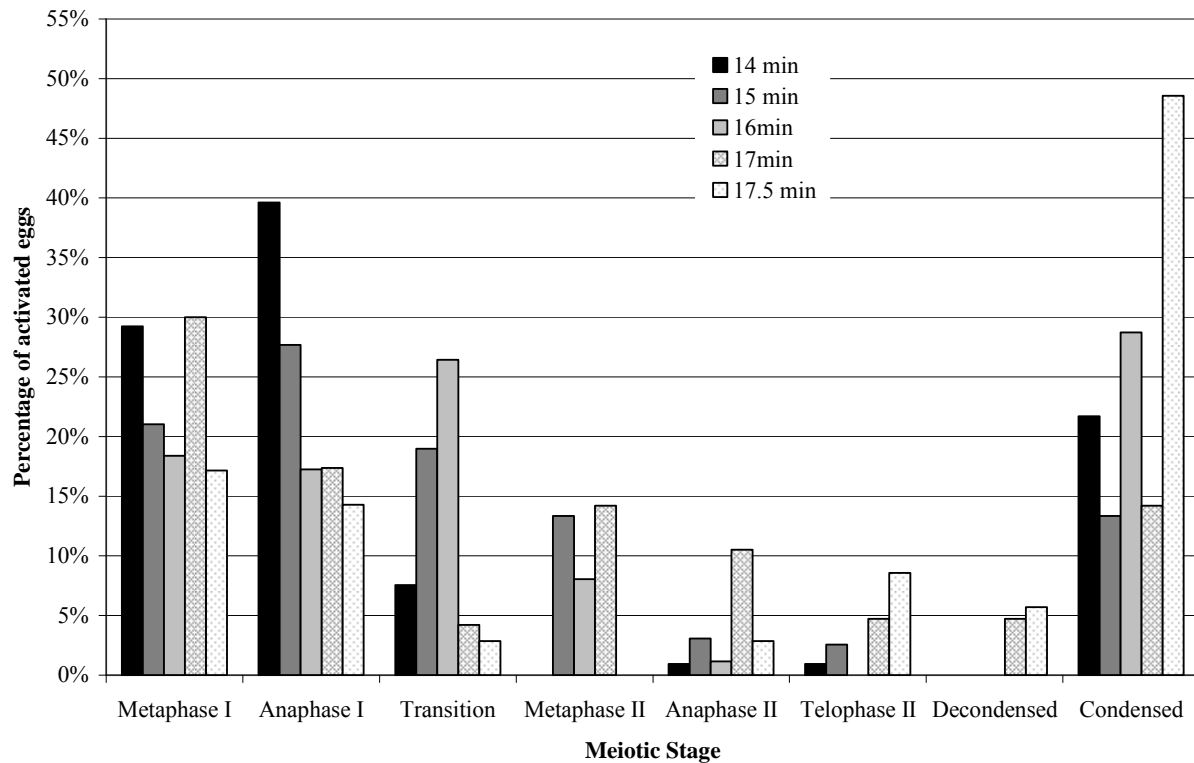

**Supplemental Figure S2: Duration of activation of wildtype eggs affects distribution among meiotic stages.**

Wildtype eggs were activated in vitro and staged based on DAPI staining. No error bars are shown because each time point is from a single experiment. Eggs with apparently condensed disorganized chromatin are grouped in the final category, although only some of the eggs in this category are likely to have completed successful meiosis.

**Supplemental Figure S3:**

**A**

| Female genotype | Eggshell hardened | Number of eggs | Percent |
|-----------------|-------------------|----------------|---------|
| control         | 131               | 131            | 100%    |
| Ya <sup>2</sup> | 123               | 124            | 99%     |

**B**

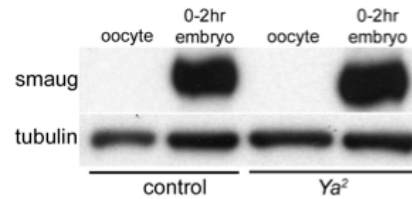

**C**

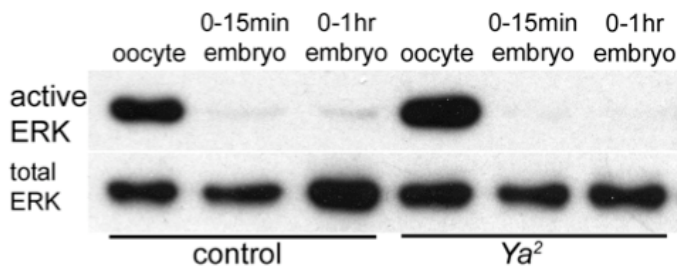

**D**

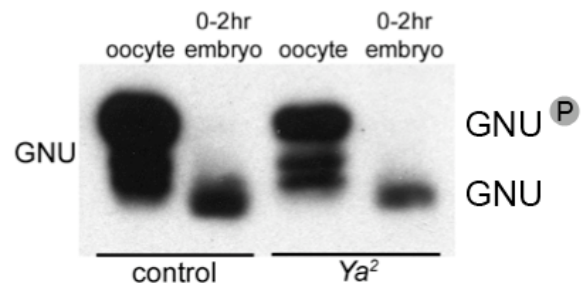

**Supplemental Figure S3: Four aspects of egg activation are normal in YA-deficient embryos.**

(A) Laid embryos were immersed in 50% bleach for two minutes to test vitelline envelope hardening [1, 2]. The percentage of laid embryos impermeable to bleach was not significantly different between control and *Ya* mutant mothers. (B) Translation of the SMAUG (SMG) protein after egg activation was assayed by western blotting with anti-SMG antibody, a gift from W. Tadros and H. Lipshitz, diluted 1:10,000 [45]. The loading control, anti- $\alpha$ -tubulin antibody (Sigma, catalog #T5168), was diluted 1:10,000. SMG levels in 0-2hr-old embryos are not significantly different between control and *Ya* mutant. (C) Dephosphorylation of the MAP kinase ERK upon egg activation was assayed by western blotting with anti-phospho-ERK antibody [8]. Anti-total ERK was used as a loading control. Phospho-ERK levels decrease upon egg activation in *Ya* mutant embryos as in controls. (D) Dephosphorylation of GNU upon egg activation was assayed by western blotting with anti-GNU antibody, a gift from T. Orr-Weaver, diluted 1:5,000 [S1]. Phosphorylated GNU in oocytes has a slower electrophoretic mobility than dephosphorylated GNU in embryos [7], and the dephosphorylated form is present in *Ya* mutant embryos as in control embryos.

S1. Lee LA, Van Hoewyk D, Orr-Weaver TL: **The *Drosophila* cell cycle kinase PAN GU forms an active complex with PLUTONIUM and GNU to regulate embryonic divisions.** *Genes Dev* 2003, **17**:2979-91.

**Supplemental Figure S4:**

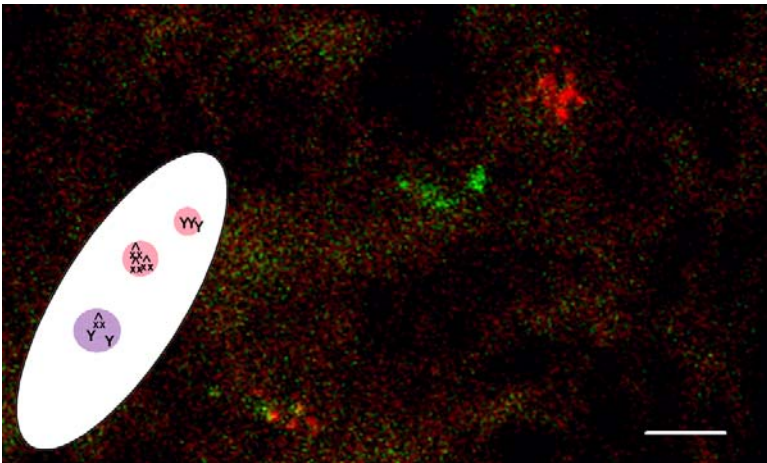

**Supplemental Figure S4: FISH of embryo with fragmenting nuclei.**

Three nuclei in which the ploidy is difficult to distinguish due to apparent deterioration of the nuclei as in [29]. The X chromosome probe's signal is green and the Y chromosome probe's is red. The inset illustration shows the orientation of the embryo and the positions of DAPI-stained nuclei inside. Bar =4um.
